# Supplementary material for: Modification mechanism of praseodymium doping for the photocatalytic performance of TiO2: a combined experimental and theoretical study
Source: Royal Society of Chemistry journal article supplement (doi:10.1039/c5cp02473k), 2015-01-01
Supplement: c5cp02473k1.pdf [file c5cp02473k1.pdf]

# Electronic Supplementary Information

## for

### Modification Mechanism of Praseodymium Doping for the Photocatalytic Performance of TiO<sub>2</sub>: A Combined Experimental and Theoretical Study

Zhi-Gang Duan<sup>1,2</sup>, Zong-Yan Zhao<sup>1,\*</sup>, Qing-Nan Shi<sup>1</sup>

<sup>1</sup> Faculty of Materials Science and Engineering, Key Laboratory of Advanced Materials of Yunnan Province, Kunming University of Science and Technology, Kunming 650093, People's Republic of China

<sup>2</sup> College of Science, Southwest Forestry University, Kunming 650224, People's Republic of China

\*Corresponding author, E-mail: zzy@kmust.edu.cn. Tel: +86-871-65109952, Fax: +86-871-65107922.

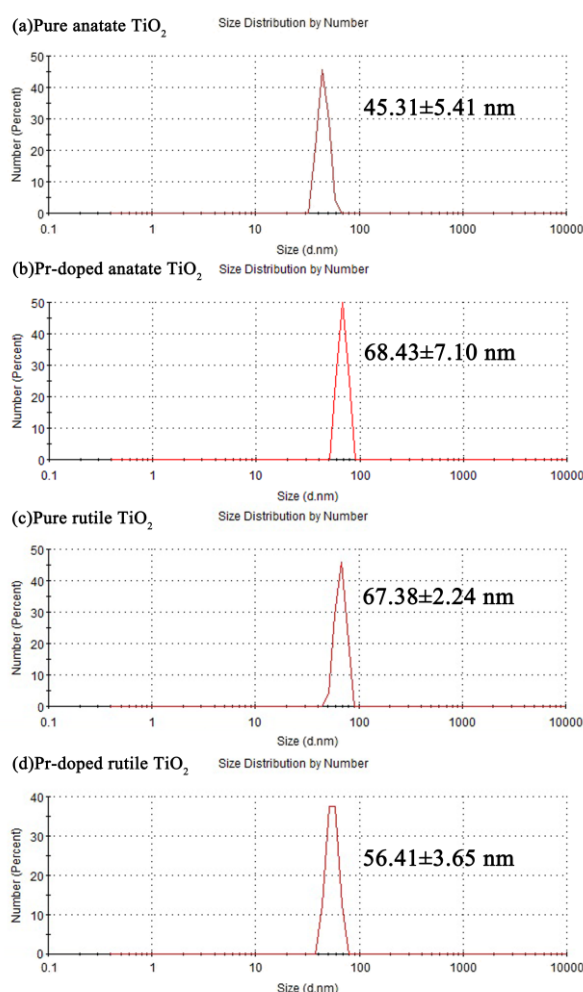

Fig. S1 The particle size of samples determined by the Zeta potential analysis

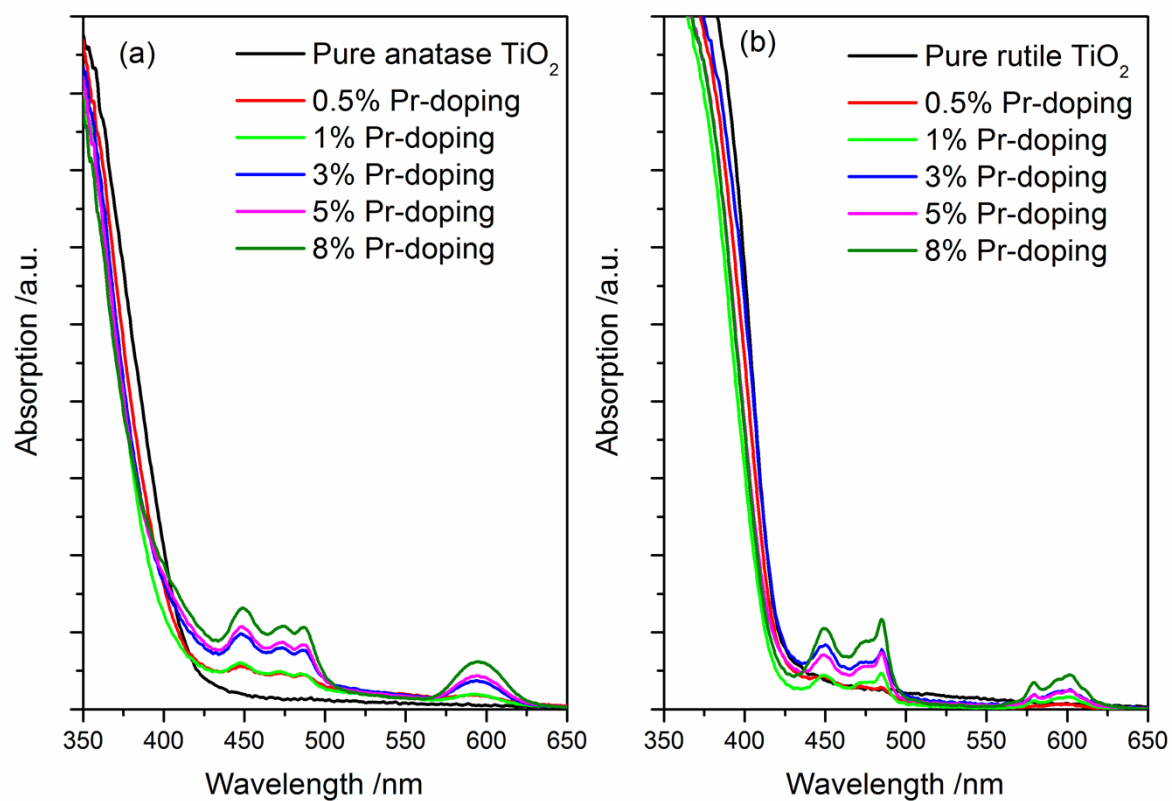

Fig. S2 The absorption spectra of Pr-doped  $\text{TiO}_2$  as function of Pr doping content: (a) Pr-doped anatase  $\text{TiO}_2$ ; (b) Pr-doped rutile  $\text{TiO}_2$ .
